# Supplementary material
Source: publisher figshare collection journal article supplement (https://acs.figshare.com/ndownloader/files/3958759)

# Syntheses of Hydroxamic Acid-Containing Bicyclic $\beta$ -Lactams via Palladium-Catalyzed Oxidative Amidation of Alkenes

Maria O. Jobbins and Marvin J. Miller\*

Department of Chemistry and Biochemistry, University of

Notre Dame, 251 Nieuwland Science Hall, Notre Dame,

Indiana 46556

[mmiller1@nd.edu](mailto:mmiller1@nd.edu)

## Supporting Information

$^1\text{H}$  and  $^{13}\text{C}$  for **17a**: S2

$^1\text{H}$  and  $^{13}\text{C}$  for **17b**: S3

$^1\text{H}$  and  $^{13}\text{C}$  for **24**: S4

$^1\text{H}$  and  $^{13}\text{C}$  for **16**: S5

ROESY for **16**: S6

$^1\text{H}$  and  $^{13}\text{C}$  for **25**: S7

$^1\text{H}$  and  $^{13}\text{C}$  for **15**: S8

$^1\text{H}$  and  $^{13}\text{C}$  for **28**: S9

$^1\text{H}$  and  $^{13}\text{C}$  for **29**: S10

$^1\text{H}$  and  $^{13}\text{C}$  for **30**: S11

$^1\text{H}$  and  $^{13}\text{C}$  for **31**: S12

ROESY for **31**: S13

$^1\text{H}$  and  $^{13}\text{C}$  for **32**: S14

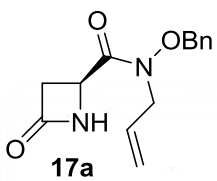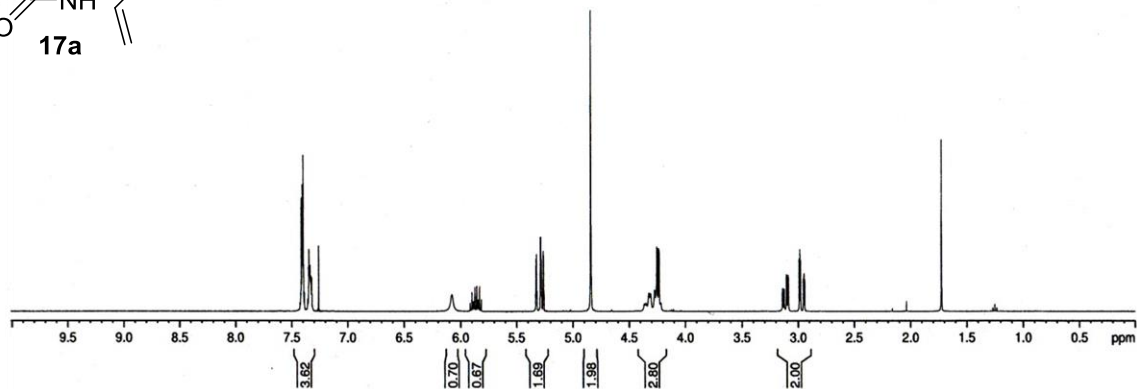

172.057  
166.833

134.092  
131.622  
129.639  
129.543  
129.178  
119.594

77.576  
77.258  
77.087  
76.940

49.559  
47.128  
43.144

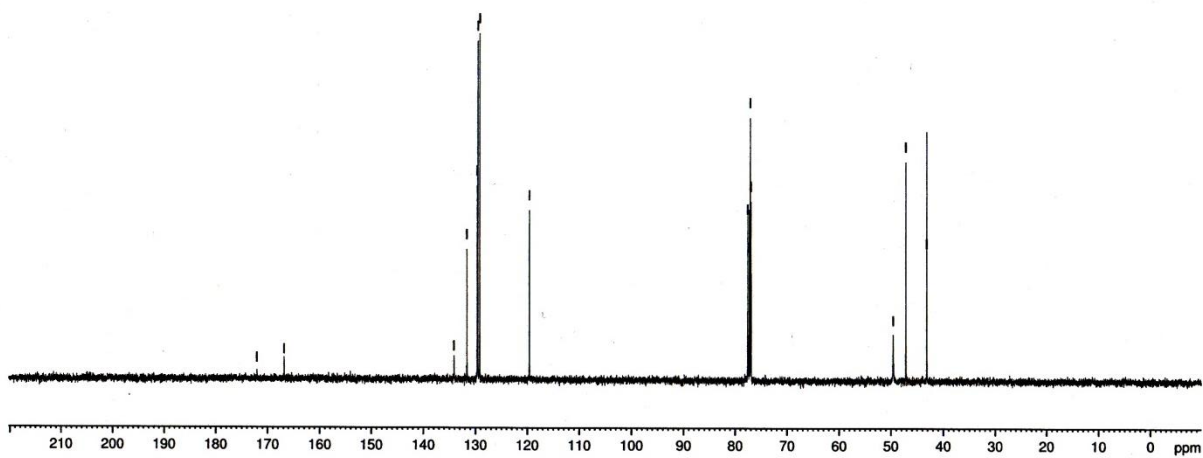

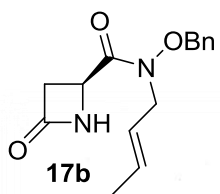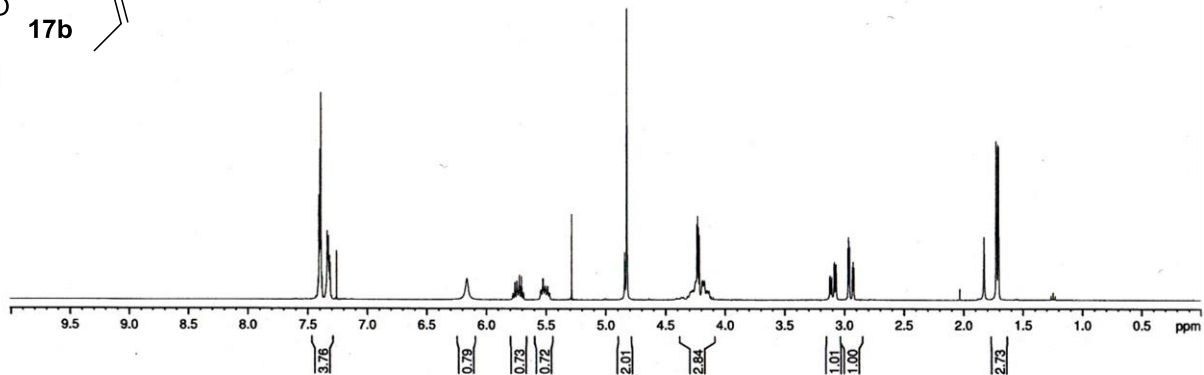

171.943  
166.972

134.203  
131.291  
129.575  
129.536  
129.148  
124.311  
123.628

77.597  
77.278  
77.015  
76.962

48.946  
47.185  
43.108

17.985  
13.279

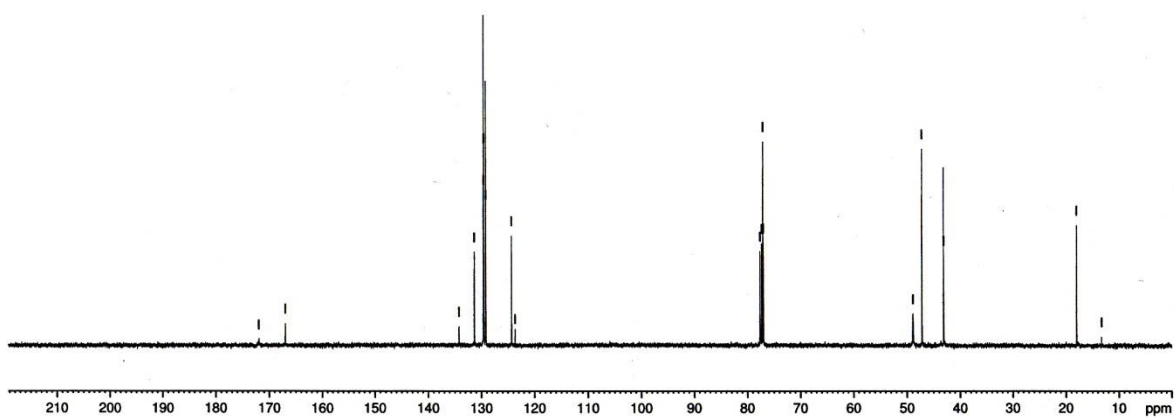

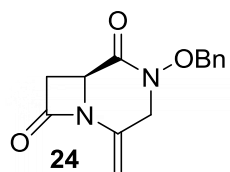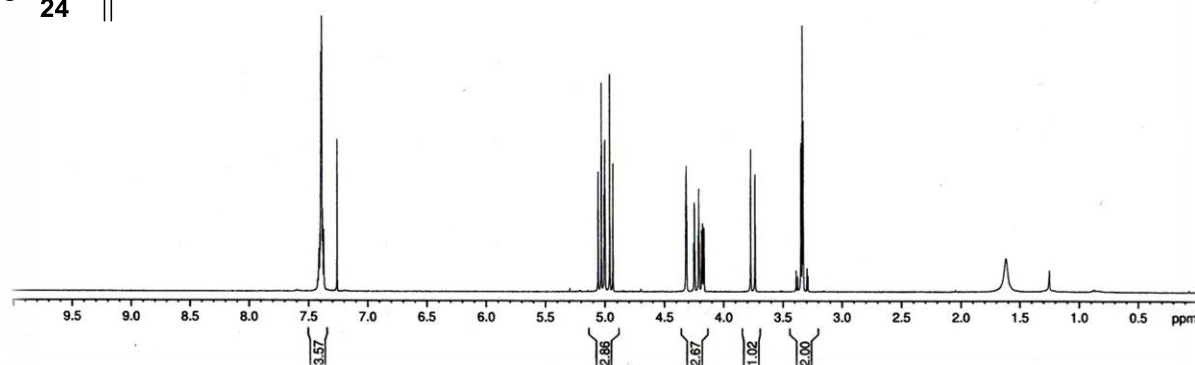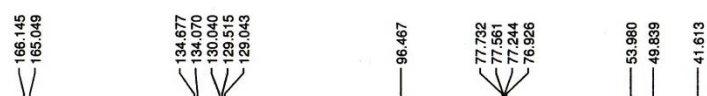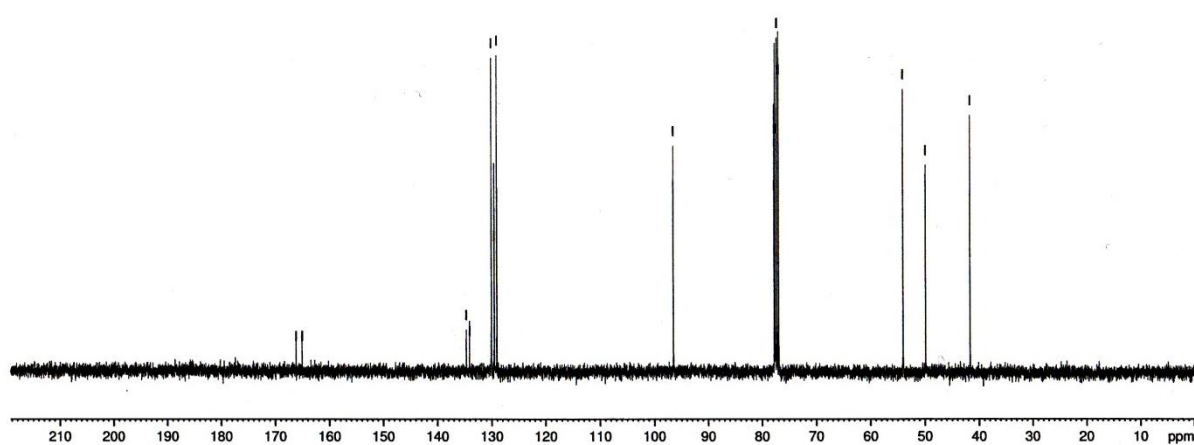

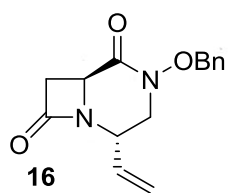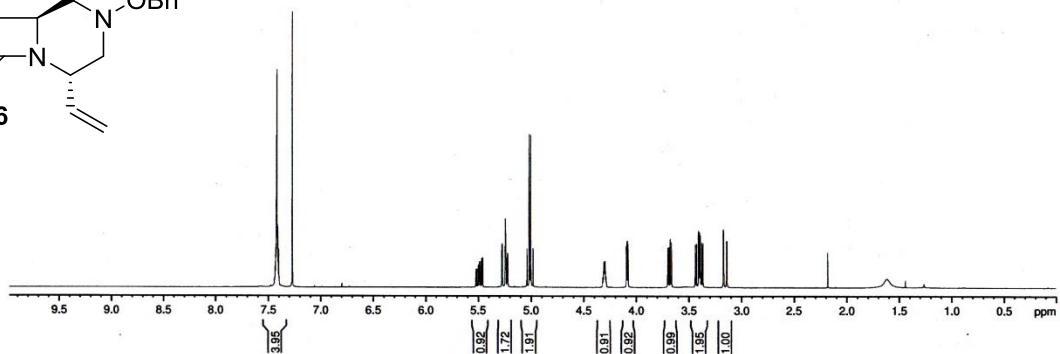

169.387  
166.833

134.885  
132.804  
130.104  
129.494  
128.983  
118.719

77.583  
77.264  
77.141  
76.947

54.564  
51.857  
48.989  
42.299

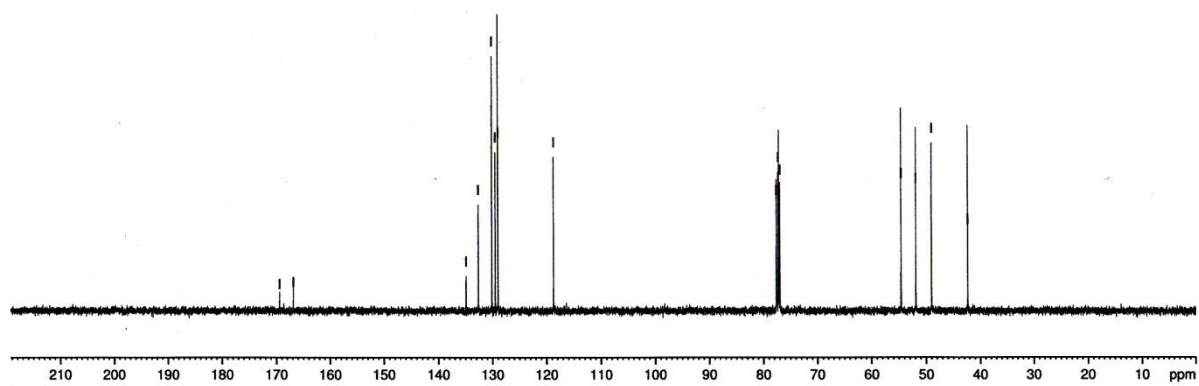

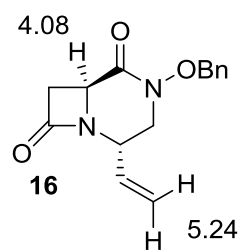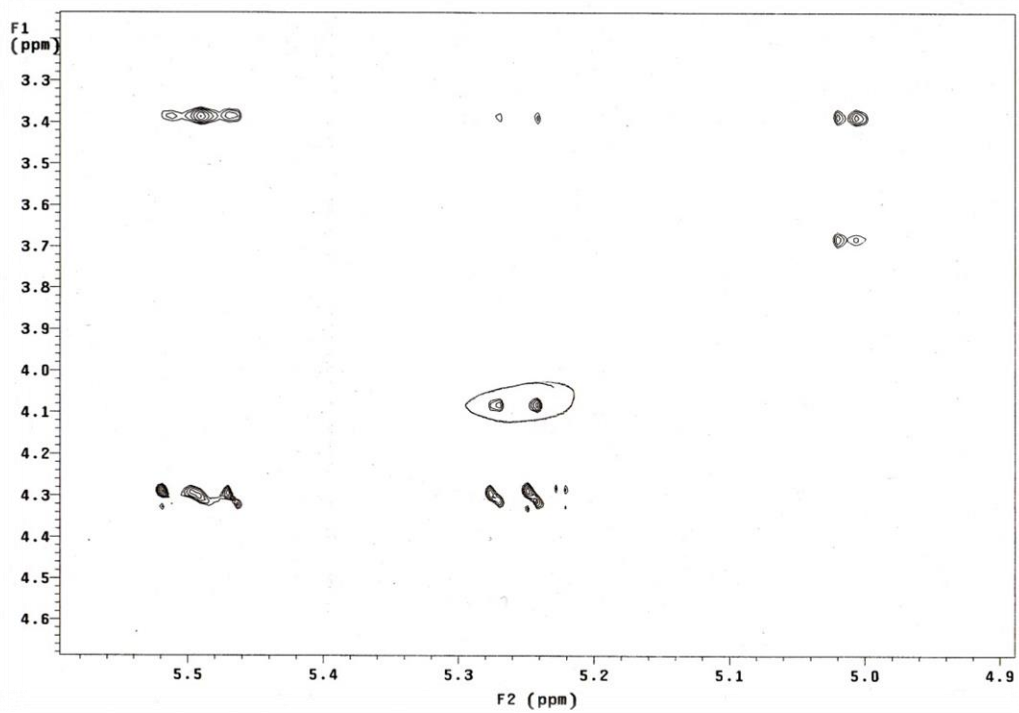

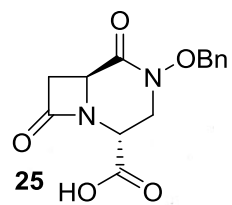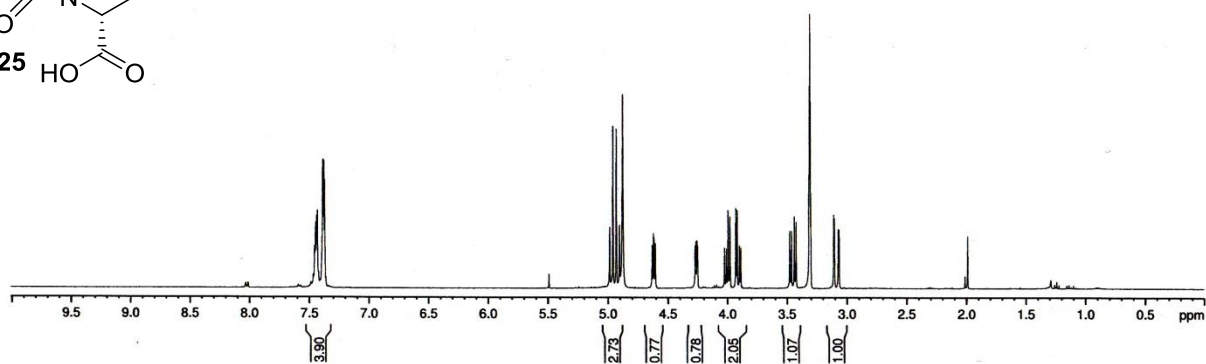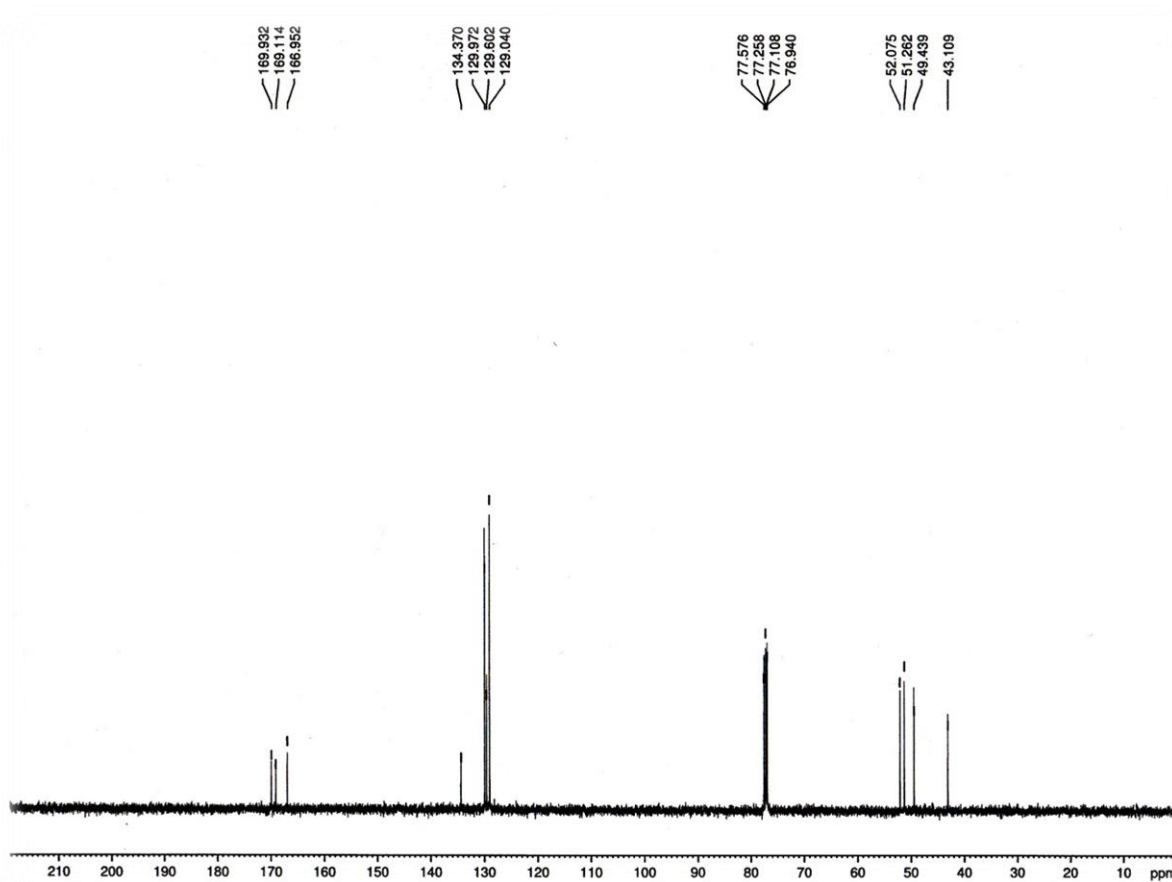

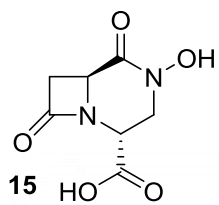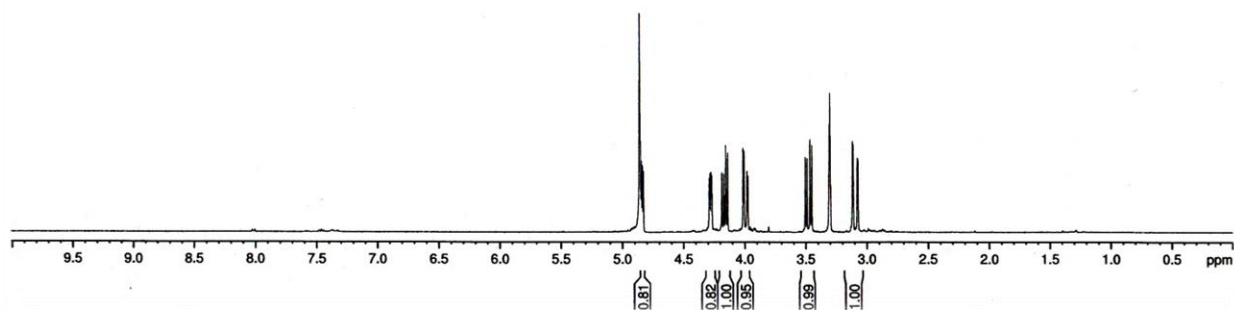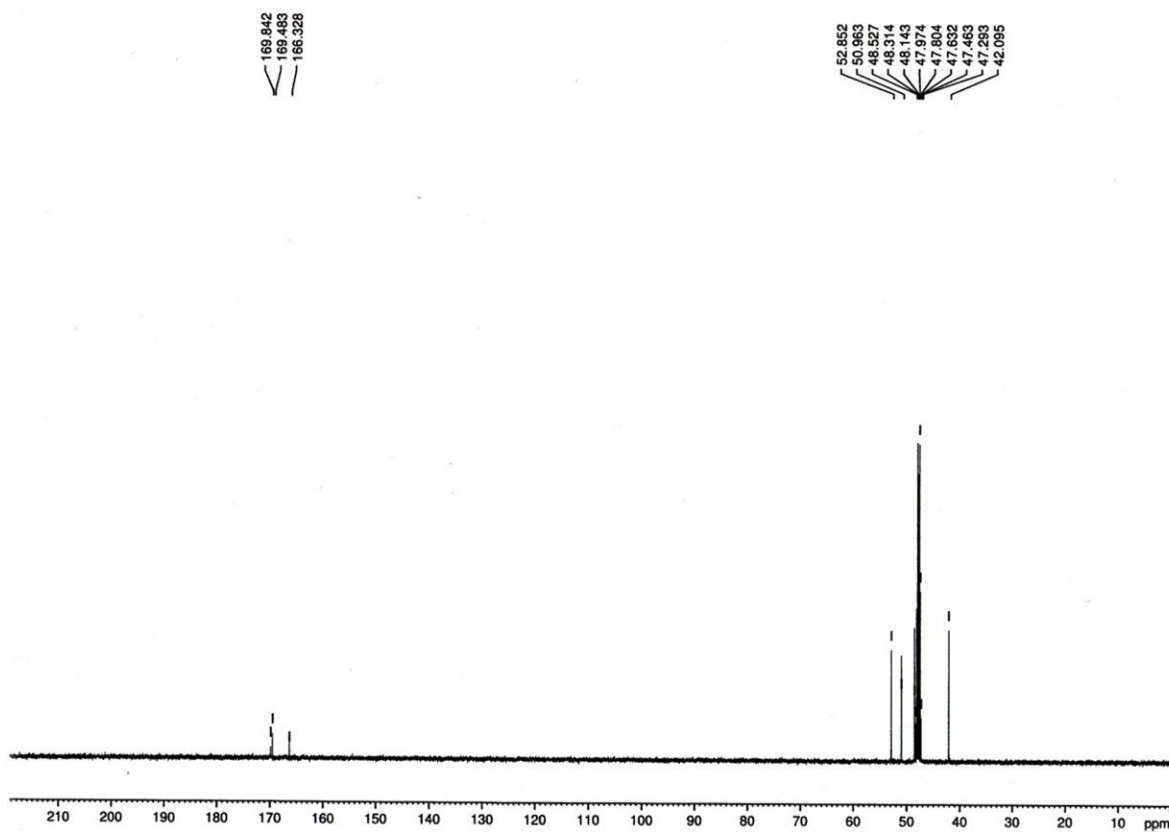



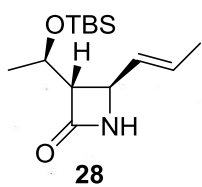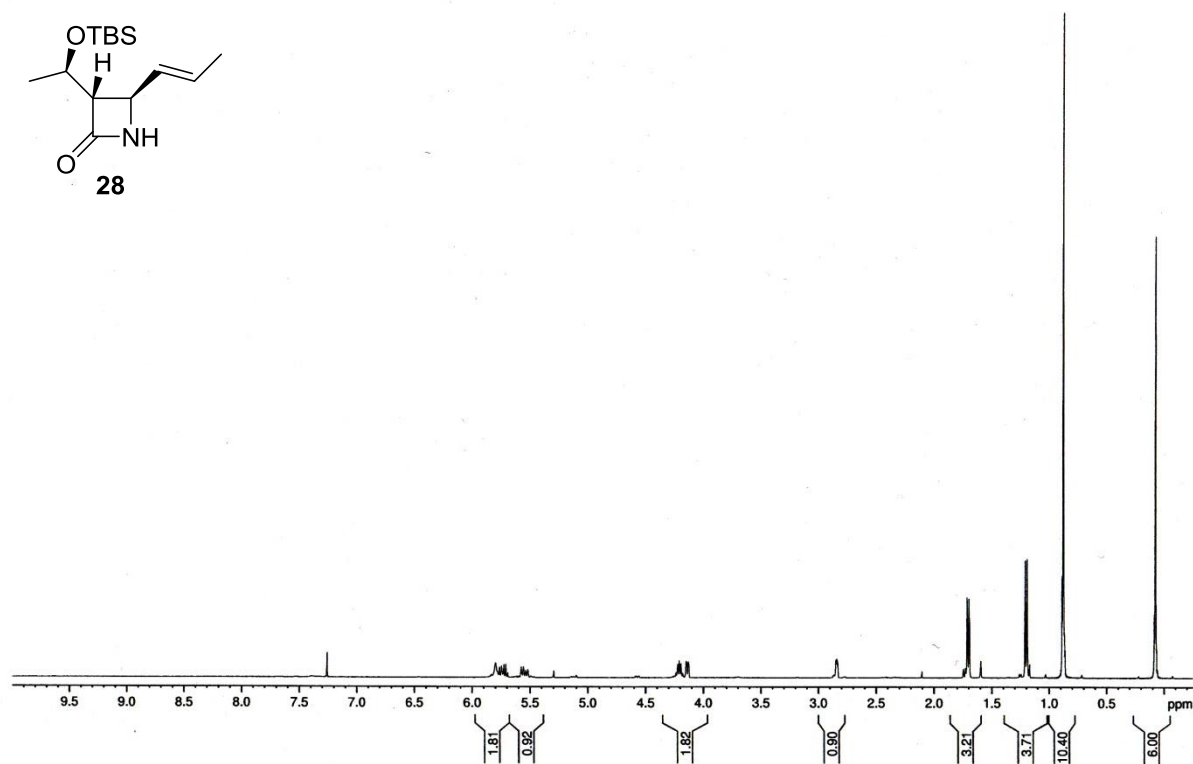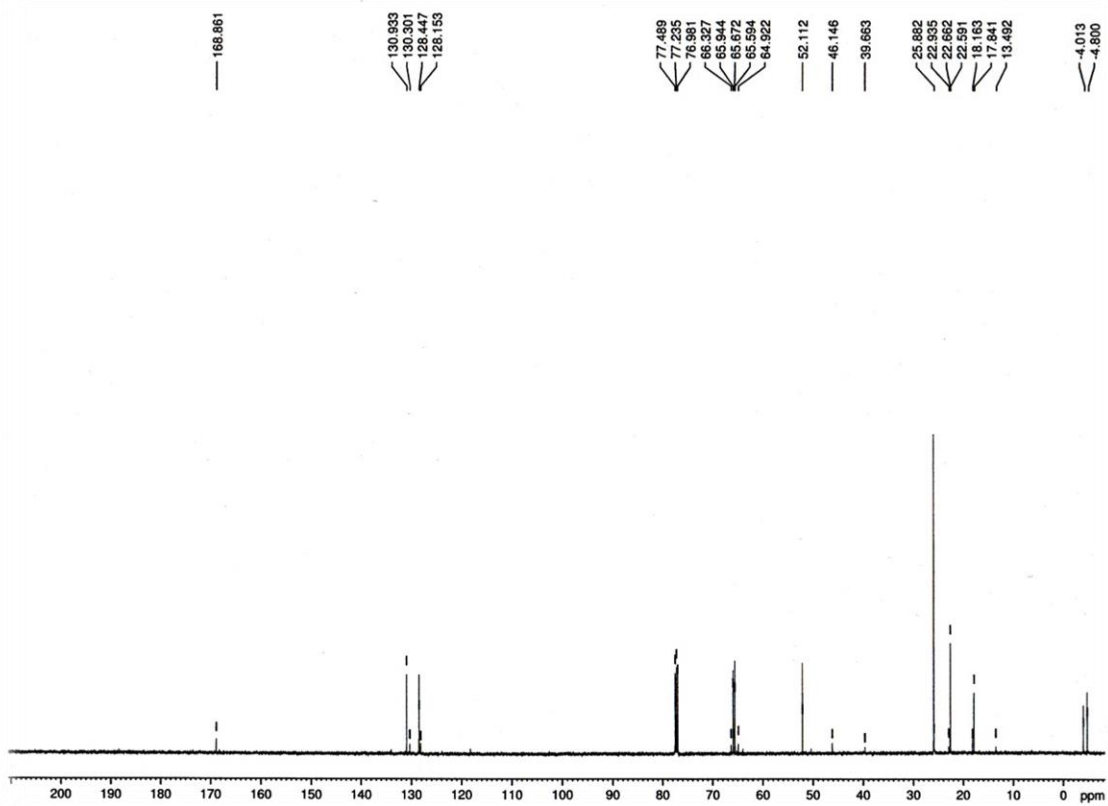

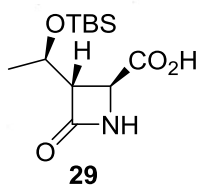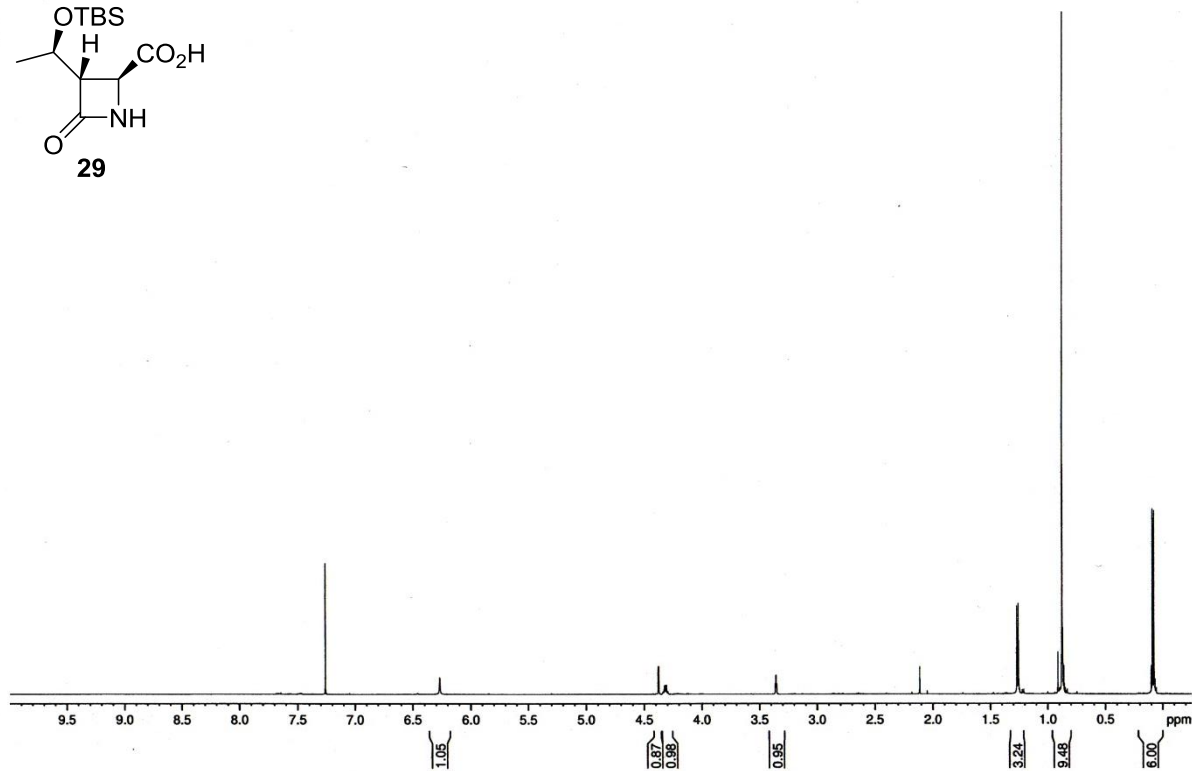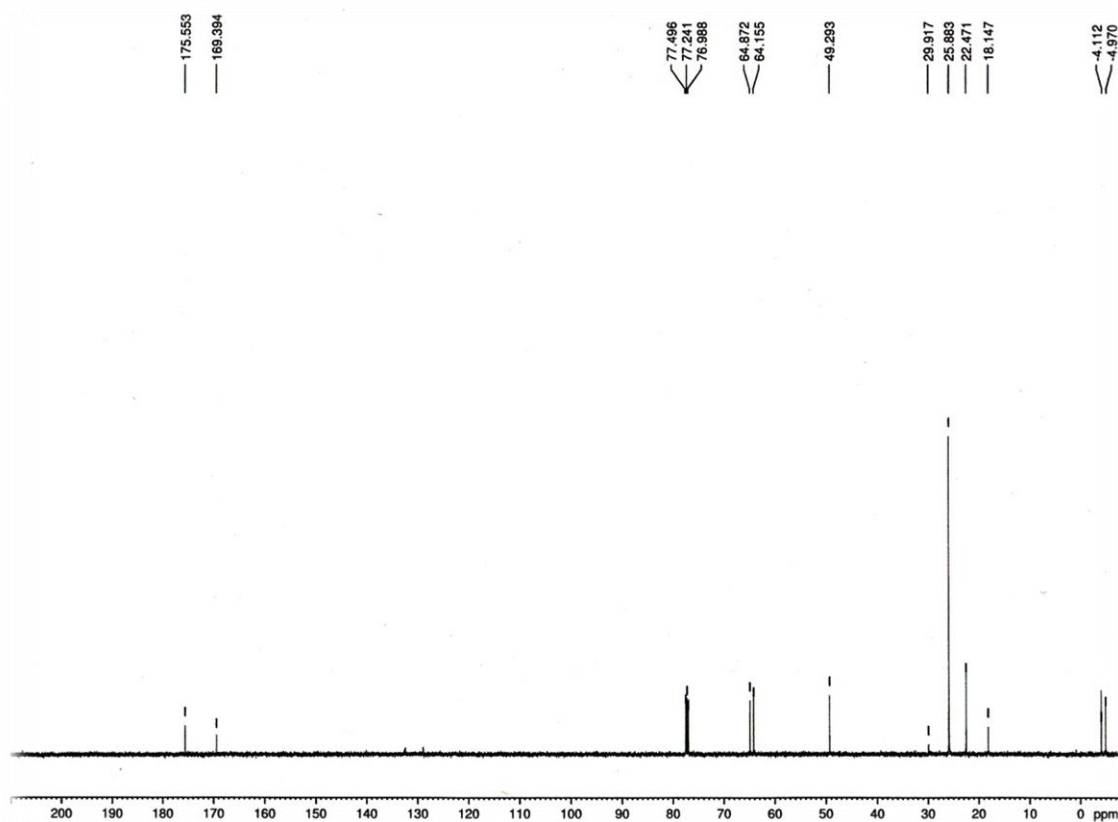

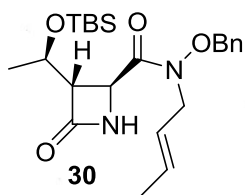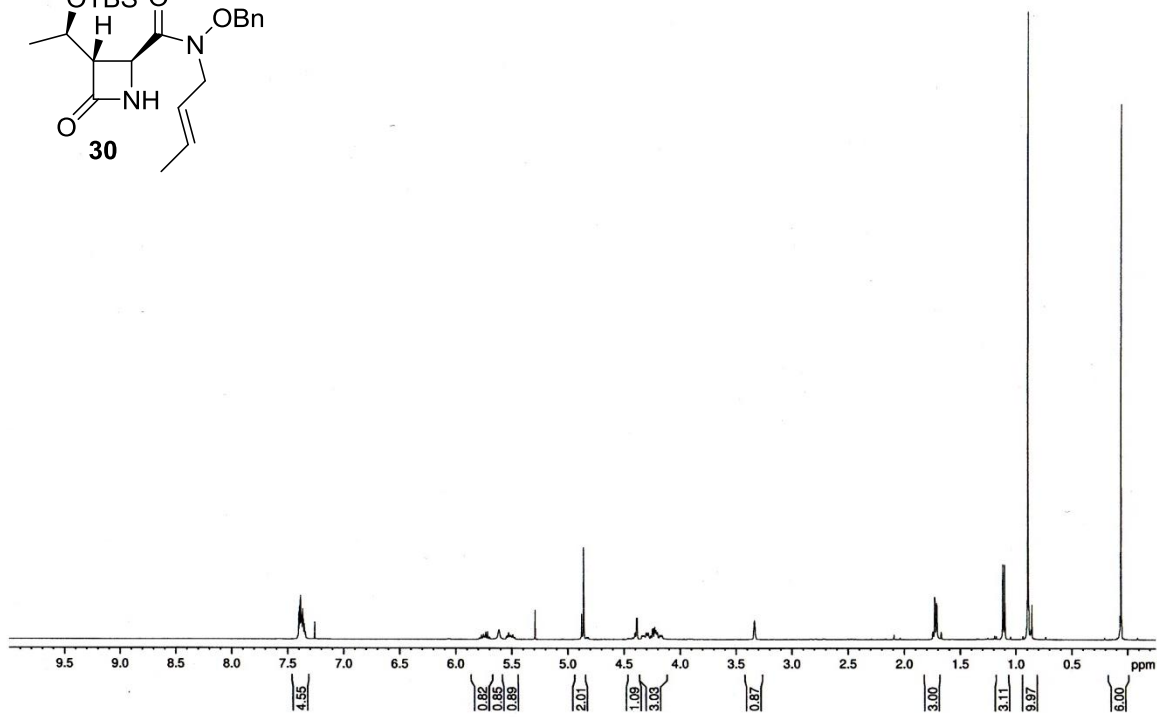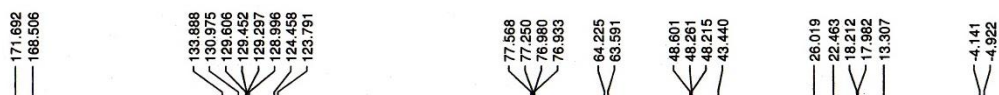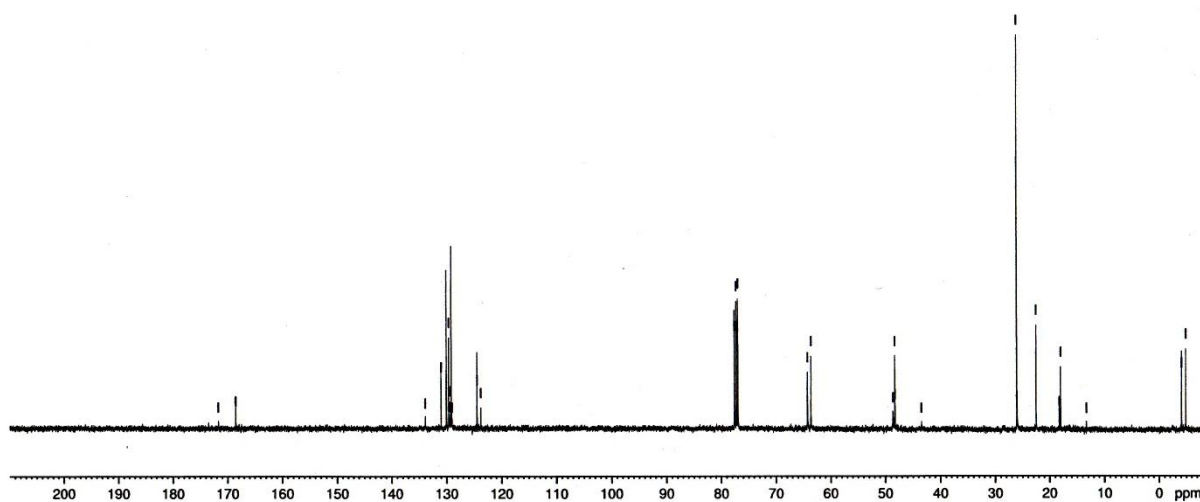

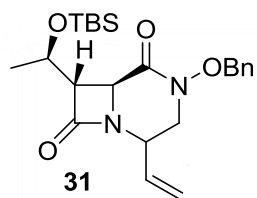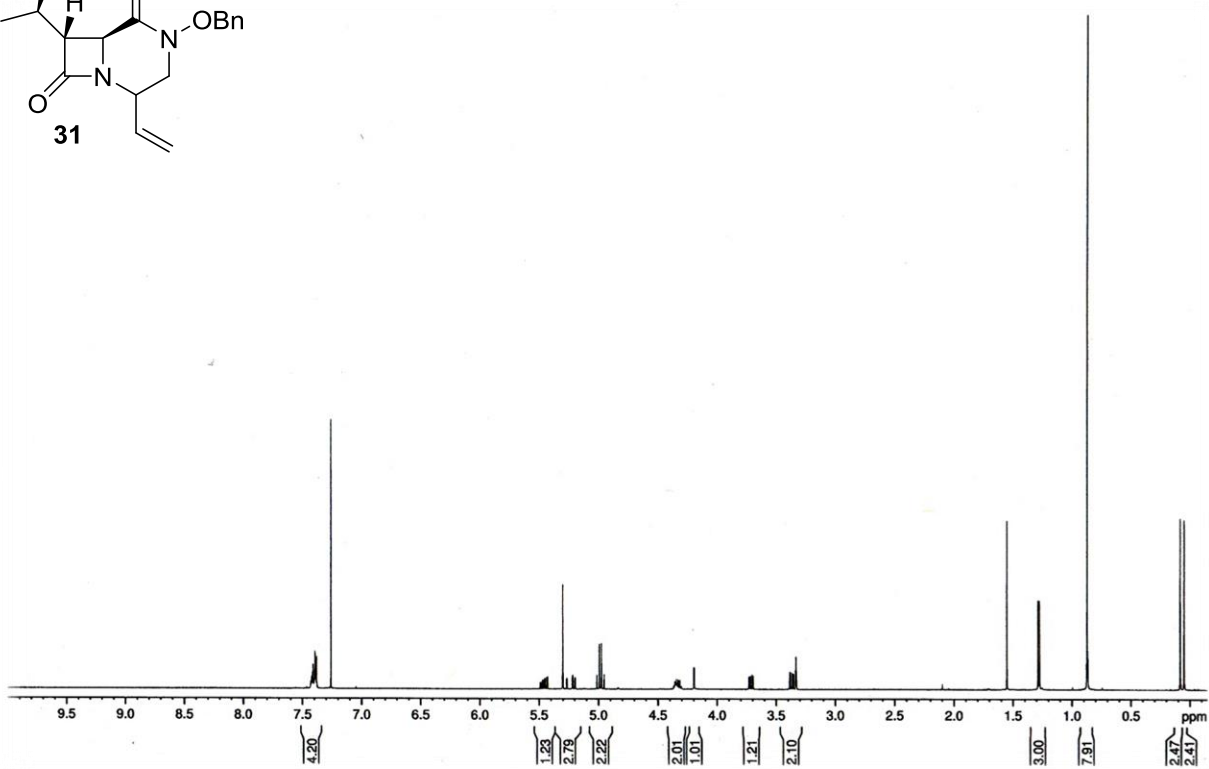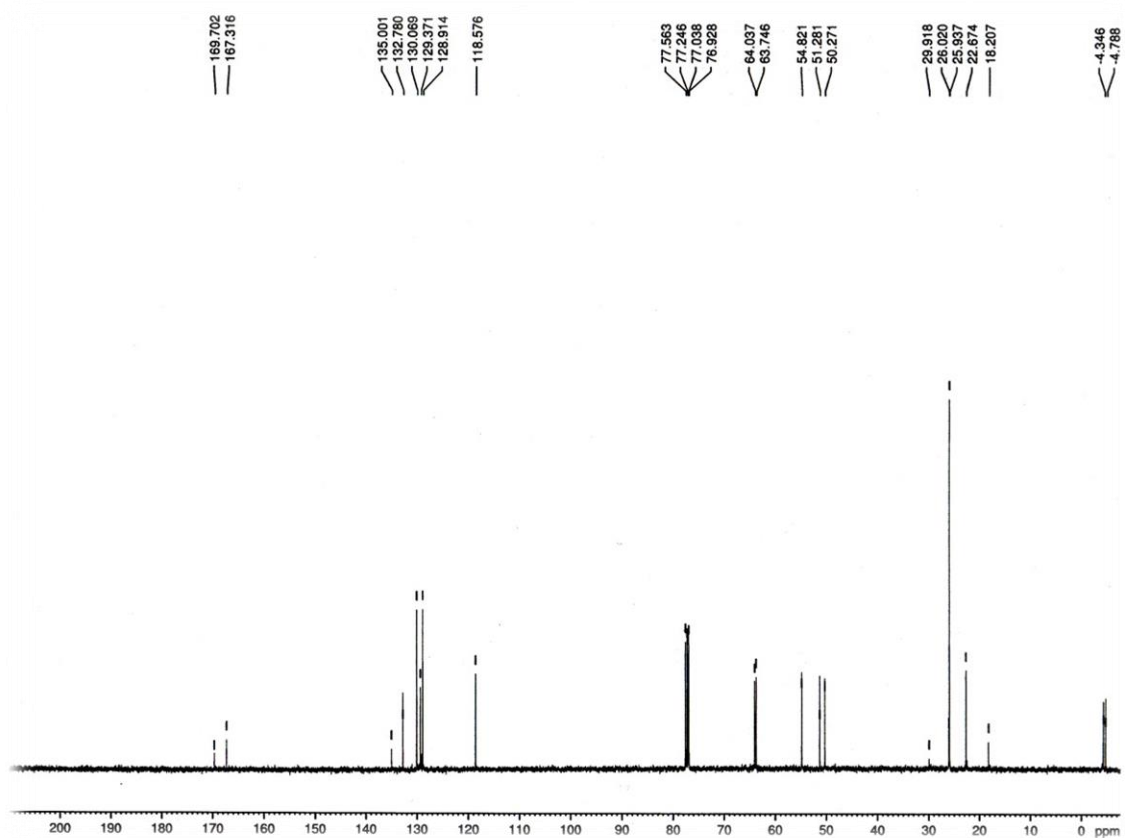

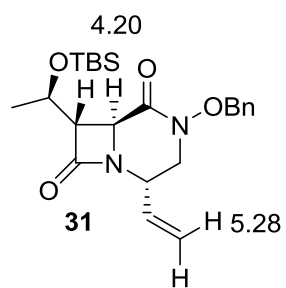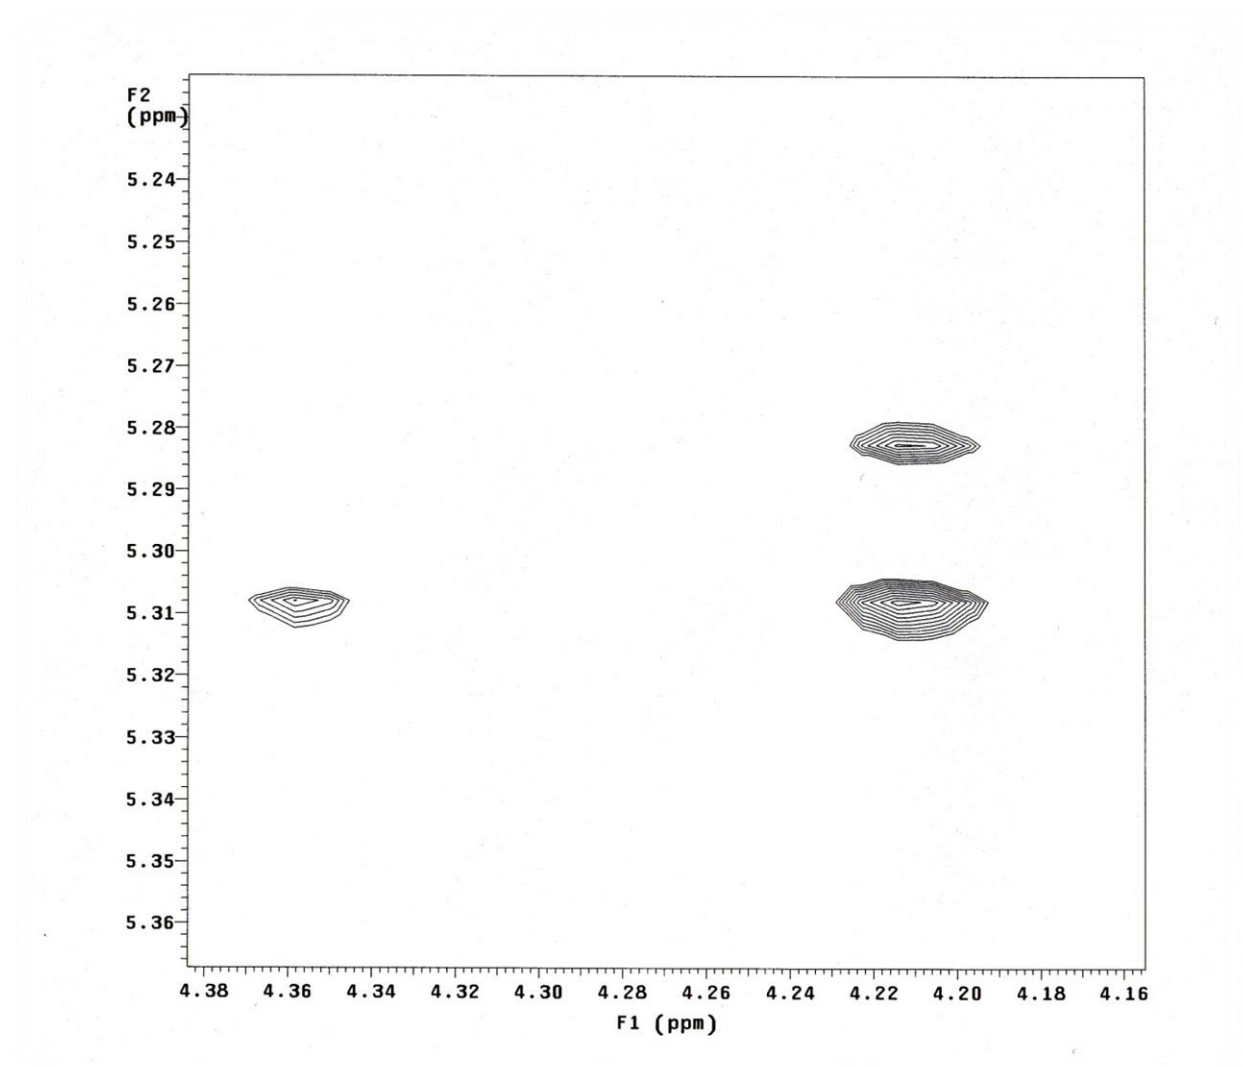

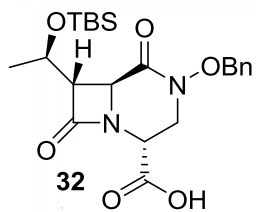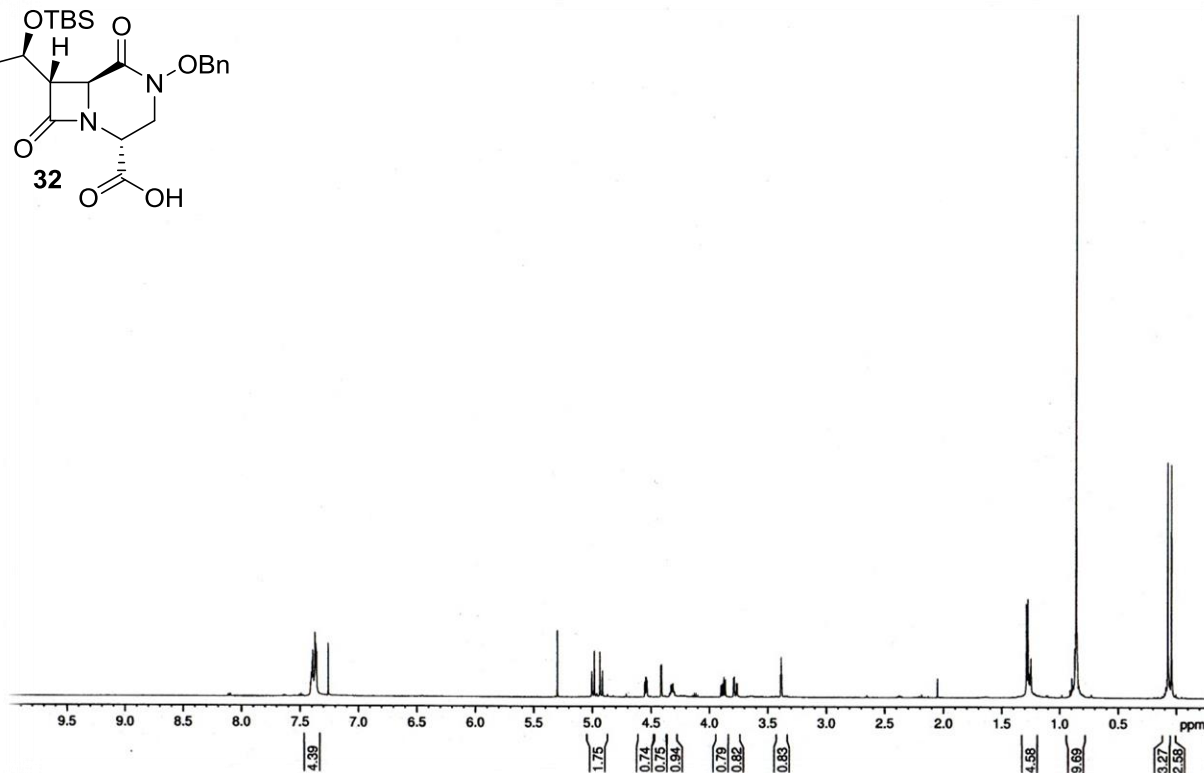

171.342  
169.383  
167.123

134.567  
130.484  
129.773  
128.472  
126.960

77.506  
77.251  
77.060  
76.997  
65.026  
63.683

52.469  
50.898  
50.501

29.933  
25.889  
25.820  
22.624  
18.125

-4.233  
-4.981

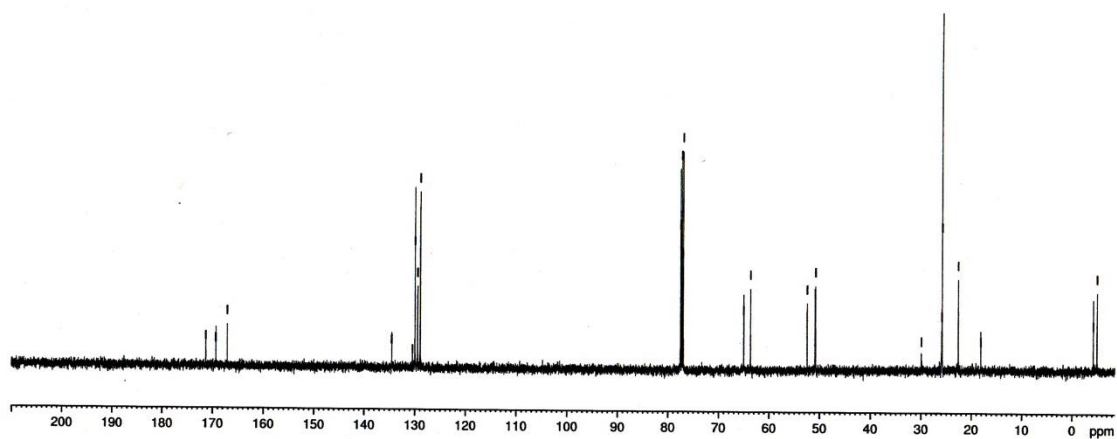

Supplement: Supplementary file 1 [file 3958759]
